# Supplementary material
Source: PubMed Central journal article supplement (PMC9077370)
Supplement: mmc1.pdf [file mmc1.pdf]

YMTHE, Volume 30

## **Supplemental Information**

**NMNAT2 is downregulated in glaucomatous  
RGCs, and RGC-specific gene therapy rescues  
neurodegeneration and visual function**

**Fang Fang, Pei Zhuang, Xue Feng, Pingting Liu, Dong Liu, Haoliang Huang, Liang Li, Wei Chen, Liang Liu, Yang Sun, Haowen Jiang, Jiangbin Ye, and Yang Hu**

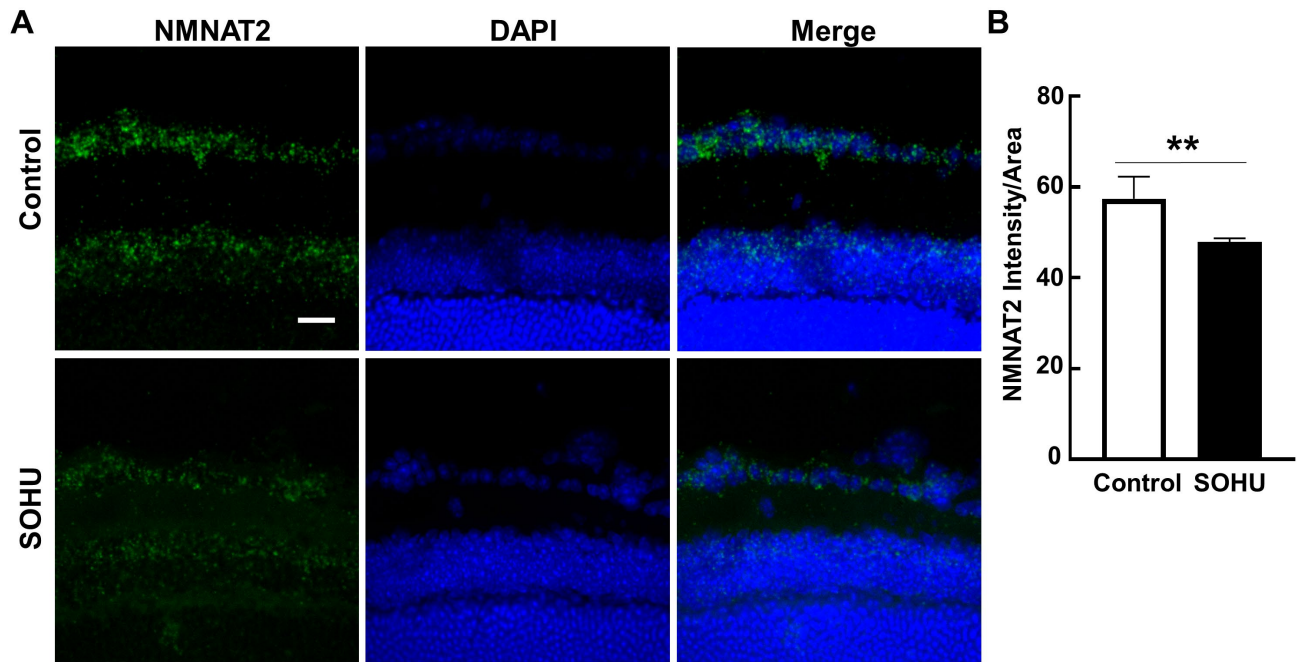

Fig. S1

1

2 **Figure S1. NMNAT2 mRNA level is decreased in glaucomatous RGCs.** (A) Representative  
 3 confocal images of retina cross-sections showing NMNAT2 mRNA levels in GCL by ISH, one week  
 4 after SO injection. GCL: ganglion cell layer. Scale bar, 20  $\mu$ m. (B) Quantification of mean  
 5 fluorescence intensity of NMNAT2, n = 5. Data are presented as means  $\pm$  SD, \*\*: p<0.01, two-tailed  
 6 unpaired t test.

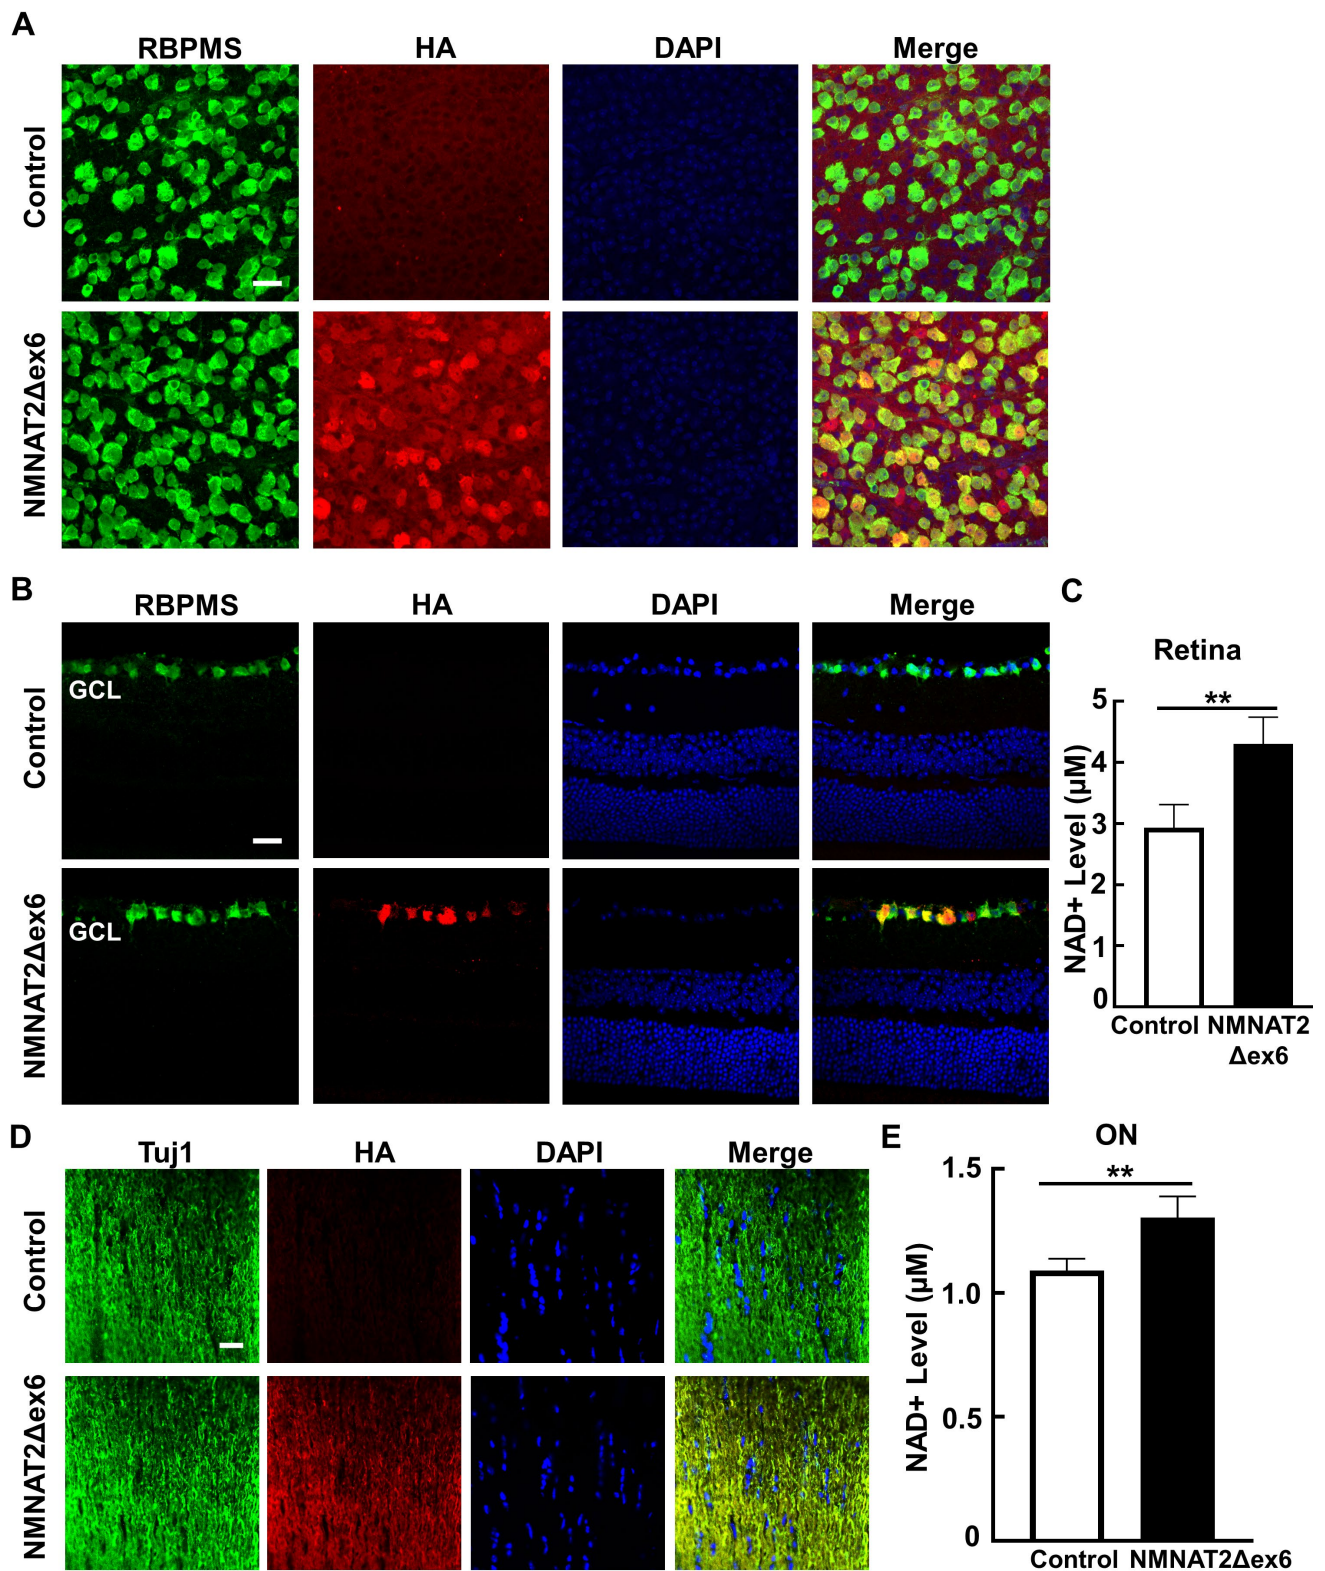

7

8 **Figure S2. AAV2-mSncg-mediated RGC-specific expression of NMNAT2Δex6 after intravitreal**  
 9 **injection. (A)** Representative confocal images of retina wholemounts showing RBPMs positive

10 (green) RGCs and HA-tagged NMNAT2 (red) overexpression in mice 2 weeks after intravitreal  
11 injection of AAV2-mSncg-3HA-NMNAT2 $\Delta$ ex6, but not in mice injected with control AAV2. Scale  
12 bar, 20  $\mu$ m. **(B)** Representative confocal images of retina cross-sections showing HA-tagged NMNAT2  
13 (red) expression in RBPMS positive (green) RGCs but not in other layers of retina, 2 weeks after  
14 intravitreal injection. GCL: ganglion cell layer. Scale bar, 20  $\mu$ m. **(C, E)** The NAD<sup>+</sup> level in whole  
15 retina lysates or ON lysates measured by NAD<sup>+</sup> biochemistry assay kit, 2 weeks after AAV2-mSncg-  
16 NMNAT2 $\Delta$ ex6 intravitreal injection. Data are presented as means  $\pm$  SD,  $n = 4$  each group; \*\*:  $p < 0.01$ ,  
17 two-tailed unpaired t test. **(D)** Representative confocal images of ON longitudinal sections  
18 immunostained for Tuj1 and HA in mice 2 weeks after intravitreal injection. Scale bar, 20  $\mu$ m.

19

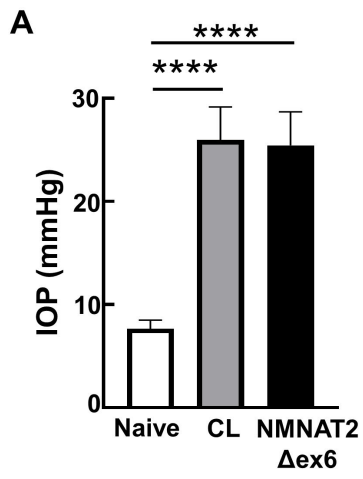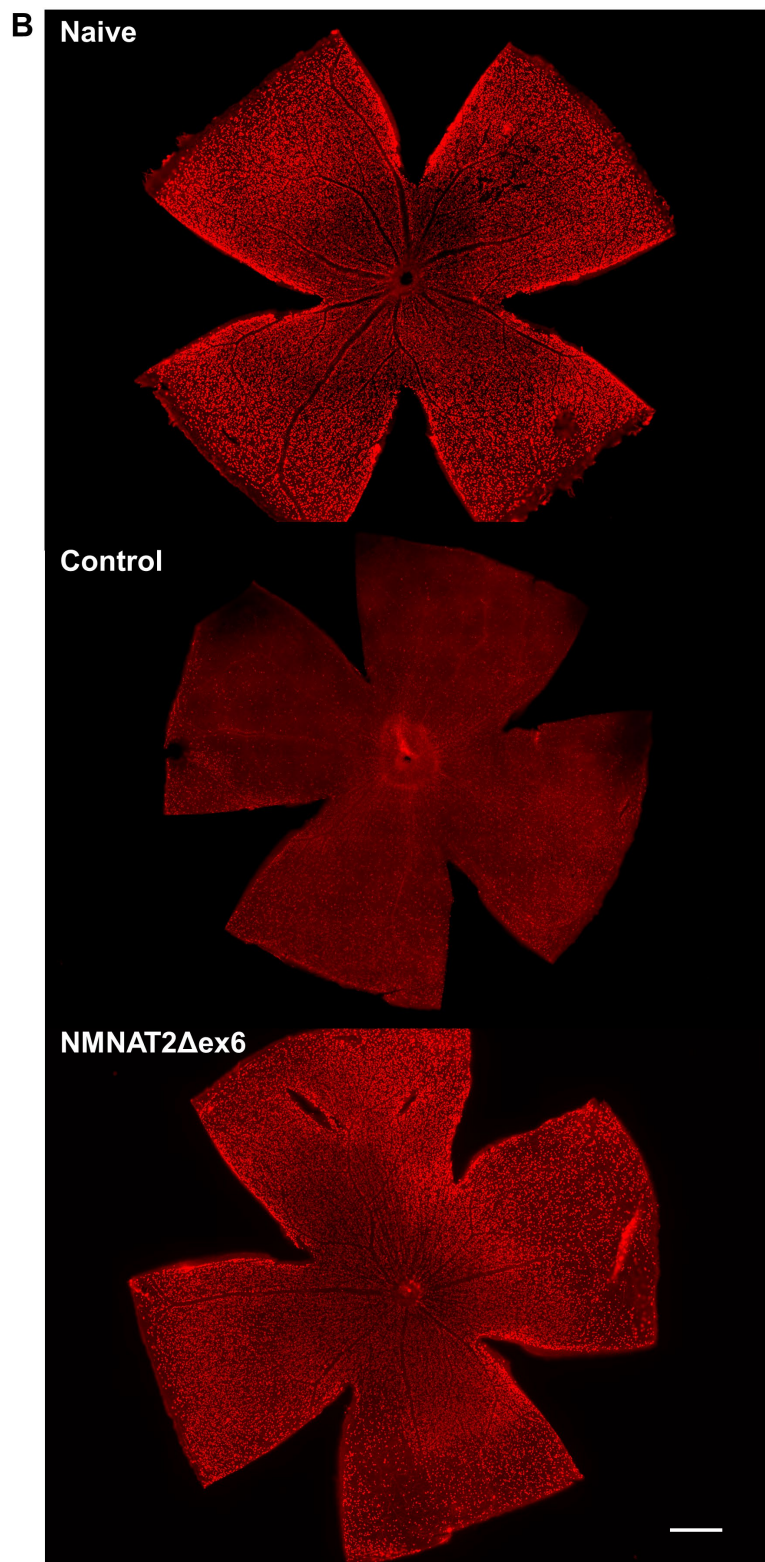

Fig. S3

21 **Figure S3. NMNAT2 overexpression does not affect IOP elevation but protects RGCs**  
22 **significantly in glaucomatous mice. (A)** IOP measurements at 3wpi. Naïve, n = 20, all groups. Data  
23 are presented as means  $\pm$  SD, \*\*\*\*:  $p < 0.0001$ , one-way ANOVA with Tukey's multiple comparisons  
24 test. **(B)** Representative fluorescence microscope images of the whole flat-mounted retinas showing  
25 surviving RBPMS positive (red) RGCs at 3wpi. Scale bar, 500  $\mu$ m.

26
